# Supplementary material for: Comprehensive analysis of genomic and immunological profiles in Chinese and Western hepatocellular carcinoma populations
Source: publisher site journal article supplement (doi:10.18632/aging.202853), 2021-04-18
Supplement: Supplementary file [file aging-v13i8-202853-supplementary-material-SD3.pdf]

## SUPPLEMENTARY TABLES

**Supplementary Table 1. Detailed information of the primary antibodies.**

| Antibody | Source         | Species | Dilution | Antigen retrieval                       |
|----------|----------------|---------|----------|-----------------------------------------|
| CD20     | Abcam, ab9475  | Mouse   | 1:200    | Citrate buffer (pH 6.0) microwave 16min |
| CD3      | Abcam, ab16669 | Rabbit  | 1:200    | Citrate buffer (pH 6.0) microwave 16min |
| CD8      | Abcam, ab33786 | Mouse   | 1:200    | Citrate buffer (pH 6.0) microwave 16min |

**Supplementary Table 2. Clinicopathologic characteristics of WCH cohort according to HBV infection.**

|                          | WCH-NonHBV-HCC (N=19) | WCH-HBV-HCC (N=81) | P-value |
|--------------------------|-----------------------|--------------------|---------|
| Age, years               | 59.3 ± 10.7           | 49.7 ± 11.3        | 0.002   |
| Gender                   |                       |                    | 0.154   |
| Male                     | 14 (73.7%)            | 71 (87.7%)         |         |
| Female                   | 5 (26.3%)             | 10 (12.3%)         |         |
| Alpha-fetoprotein, ng/mL |                       |                    | 0.448   |
| <400                     | 13 (68.4%)            | 47 (58.0%)         |         |
| ≥400                     | 6 (31.6%)             | 34 (42.0%)         |         |
| Tumor size, cm           | 7.9 ± 4.9             | 6.7 ± 4.1          | 0.297   |
| Tumor number             |                       |                    | 0.143   |
| Single                   | 9 (52.9%)             | 58 (73.4%)         |         |
| Multiple                 | 8 (47.1%)             | 21 (26.6%)         |         |
| TNM stage                |                       |                    | 0.272   |
| I                        | 6 (31.6%)             | 34 (42.0%)         |         |
| II                       | 7 (36.8%)             | 27 (33.3%)         |         |
| IIIA                     | 5 (26.3%)             | 9 (11.1%)          |         |
| IIIB                     | 1 (5.3%)              | 11 (13.6%)         |         |
| Tumor differentiation    |                       |                    | 1.000   |
| High                     | 8 (47.1%)             | 40 (50.6%)         |         |
| Low                      | 9 (52.9%)             | 39 (49.4%)         |         |
| Microvascular invasion   |                       |                    | 1.000   |
| No                       | 13 (68.4%)            | 57 (70.4%)         |         |
| Yes                      | 6 (31.6%)             | 24 (29.6%)         |         |

**Supplementary Table 3. Clinicopathologic characteristics of TCGA cohort.**

|                          | <b>TCGA-Alcol-HCC (N=69)</b> | <b>TCGA-HBV-HCC (N=106)</b> | <b>P-value</b> |
|--------------------------|------------------------------|-----------------------------|----------------|
| Age, years               | 63.5 ± 11.6                  | 54.8 ± 11.7                 | <0.001         |
| Gender                   |                              |                             | 0.734          |
| Male                     | 58 (84.1%)                   | 87 (82.1%)                  |                |
| Female                   | 11 (15.9%)                   | 19 (17.9%)                  |                |
| Race                     |                              |                             | <0.001         |
| White                    | 41 (61.2%)                   | 9 (8.7%)                    |                |
| Asian                    | 25 (37.3%)                   | 92 (88.5%)                  |                |
| Black                    | 1 (1.5%)                     | 3 (2.9%)                    |                |
| Alpha-fetoprotein, ng/mL |                              |                             | 0.518          |
| <400                     | 32 (80.0%)                   | 74 (73.3%)                  |                |
| ≥400                     | 8 (20.0%)                    | 27 (26.7%)                  |                |
| TNM stage                |                              |                             | <0.001         |
| I                        | 23 (38.3%)                   | 71 (68.3%)                  |                |
| II                       | 12 (20.0%)                   | 21 (20.2%)                  |                |
| III                      | 25 (41.7%)                   | 10 (9.6%)                   |                |
| IV                       | 0 (0.0%)                     | 2 (1.9%)                    |                |
| Tumor differentiation    |                              |                             | <0.001         |
| High                     | 50 (72.5%)                   | 44 (41.5%)                  |                |
| Low                      | 19 (27.5%)                   | 62 (58.5%)                  |                |
| Vascular invasion*       |                              |                             | 0.032          |
| No                       | 23 (53.5%)                   | 74 (71.8%)                  |                |
| Yes                      | 20 (46.5%)                   | 29 (28.2%)                  |                |

\*Including macro- and micro-vascular invasion.
